# Supplementary material for: Enhanced electron transfer mediated detection of hydrogen peroxide using a silver nanoparticle–reduced graphene oxide–polyaniline fabricated electrochemical sensor
Source: Royal Society of Chemistry journal article supplement (doi:10.1039/c7ra11466d), 2018-01-01
Supplement: c7ra11466d1.pdf [file c7ra11466d1.pdf]

**Figure S1**

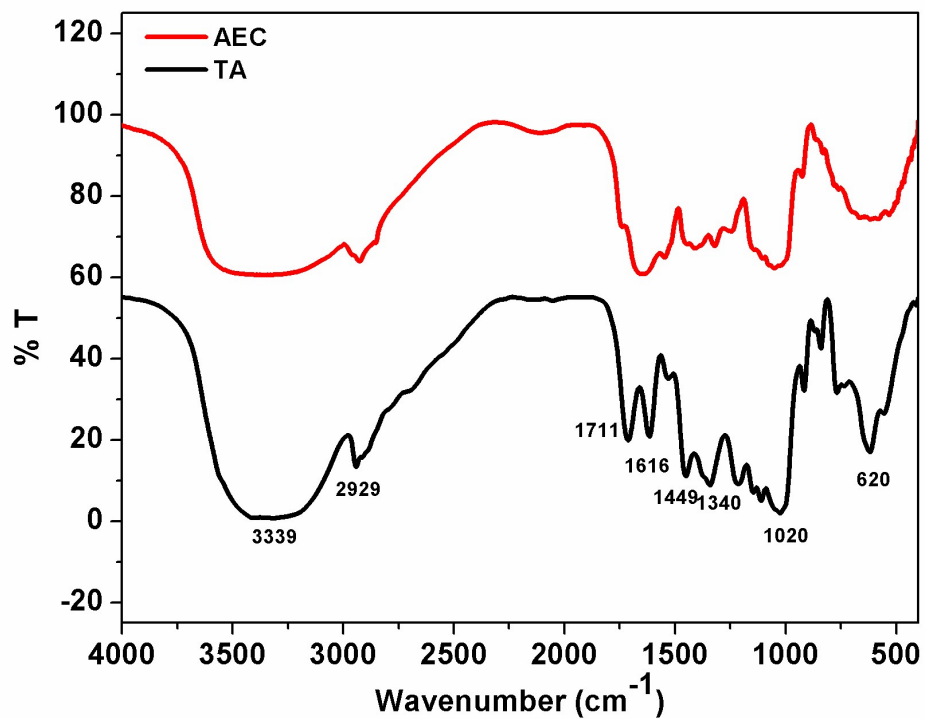

**Figure S1** FTIR spectra of the tannic acid (TA) and aqueous extract of *Croton bonplandianum* (AEC)
